# Supplementary material for: Media representations of COVID-19 public health policies: assessing the portrayal of essential health services in Canadian print media
Source: Springer Nature journal article supplement (doi:10.1186/s12889-021-10300-2), 2021-02-03
Supplement: MOESM1 [file 12889_2021_10300_MOESM1_ESM.pdf]

***Enter numbers attached to each code in the excel file (numbers only please). Please insert all descriptive codes in a separate column next to the associated variable (e.g. where asked to specify “other”).***

- 1) Article type
  - a) News article – 1
  - b) Editorial or opinion – 2
  - c) Other (specify) – 3
  - d) Not specified or unclear – 4
- 2) Author or article source?
  - a) Journalist/Reporter – 1
  - b) Expert – 2
  - c) Other (specify) – 3
  - d) Not specified or unclear – 4
- 3) Jurisdiction(s) discussed in the article, i.e. source of the essential services list discussed in the article:
  - a) Alberta – 1
  - b) BC – 2
  - c) Manitoba – 3
  - d) New Brunswick – 4
  - e) Newfoundland & Labrador – 5
  - f) Northwest Territories - 6
  - g) Nova Scotia – 7
  - h) Nunavut – 8
  - i) Ontario – 9
  - j) Prince Edward Island – 10
  - k) Saskatchewan – 11
  - l) Quebec – 12
  - m) Yukon – 13
  - n) More than one jurisdiction – 14
- 4) What sectors are discussed in the article? (do not include mere mentions)
  - a) Multiple sectors – 1
  - b) Multiple sectors, including healthcare - 2
  - c) Healthcare only – 3
  - d) One other sector only – 4
  - e) No sectors mentioned or discussed – 5
- 5) Does the article discuss healthcare sectors other diagnostic and treatment services aimed at achieving a cure or managing symptoms? Other healthcare sectors includes preventative care (e.g. vaccinations), health promotion or health improvement services (e.g. gyms):
  - a) Yes – 1
  - b) No – 2
- 6) If other healthcare sectors are discussed, does the article support including them in the list of essential services:
  - a) Yes – 1
  - b) No – 2
  - c) Not applicable or does not include a view or opinion on whether these sectors should be included – 3
- 7) Are liquor stores and/or cannabis stores discussed? (do not include mere mentions)
  - a) Yes – 1
  - b) No – 2
- 8) Does the article state or imply that liquor stores and/or cannabis stores are essential health services?
  - a) Yes – 1
  - b) No – 2

- 9) If liquor and/or cannabis stores are discussed in the article, is the article:
- a) Supportive of including them in the list of essential services – 1
  - b) Critical of including them in the list of essential services – 2
  - c) Neutral or balanced regarding including them in the list of essential services – 3
  - d) Silent on including them in the list of essential services – 4
