# Supplementary material for: Media representations of COVID-19 public health policies: assessing the portrayal of essential health services in Canadian print media
Source: BMC Public Health. 2021 Feb 3;21:273. doi: 10.1186/s12889-021-10300-2 (PMC7856611; doi:10.1186/s12889-021-10300-2)
Supplement: Supplementary file 2 — Additional file 2. Raw Data. [file 12889_2021_10300_MOESM2_ESM.xlsx]

## Sheet: Sheet1
1 - Article Type	2 - Author	3 - Jurisdiction	4 - Sector discussed	5 - Other health sector?	6 - Opinion on inclusion of other health sector	7 - Liquor / cannabis stores?	8 - Liquor / cannabis stores essential health service?	9 - Framing of inclusion of liquor / cannabis stores
1	1	14	1	2	3	2	2	4
2	1	14	2	1	1	2	2	3
1	1	14	4	2	3	2	2	4
1	1	14	1	2	1	1	1	1
1	1	9	5	2	3	2	2	4
1	1	2	4	2	3	2	2	4
1	1	9	4	2	1	2	2	4
1	4	14	4	2	3	2	2	4
1	1	9	5	2	3	2	2	3
1	1	9	4	2	3	2	2	4
1	1	14	4	2	3	2	2	4
1	1	9	4	2	3	2	2	4
1	1	9	4	2	3	2	2	4
1	1	9	4	2	3	1	1	3
1	1	2	4	2	3	2	2	4
1	1	2	4	2	3	2	2	4
1	1	2	2	2	3	2	2	4
1	1	11	4	2	3	2	2	4
2	1	12	3	1	1	1	1	1
1	1	9	4	2	3	2	2	4
1	1	14	3	1	3	2	2	4
1	1	7	5	2	3	2	2	4
2	2	14	4	2	3	2	2	4
1	1	1	4	2	3	2	2	4
1	1	9	4	2	3	2	2	4
1	1	9	4	2	3	2	2	4
1	1	12	4	2	3	2	2	4
1	2	9	4	2	3	2	2	4
1	1	2	5	2	3	2	2	4
1	1	1	5	2	3	2	2	3
1	1	1	1	2	3	2	2	4
1	1	7	4	2	3	2	2	4
2	1	14	4	2	3	2	2	4
1	4	14	4	1	3	2	2	4
1	1	2	2	2	3	2	2	3
1	1	2	4	2	3	2	2	4
1	1	9	4	2	3	2	2	4
1	1	9	4	2	3	2	2	4
1	1	14	4	2	3	2	2	4
2	1	14	4	2	3	2	2	4
1	1	1	4	2	3	2	2	4
1	1	2	4	2	3	2	2	4
1	1	2	4	2	3	2	2	4
1	1	11	4	2	3	2	2	4
1	1	2	4	2	3	2	2	4
1	1	7	1	2	3	2	2	4
1	1	2	1	2	3	2	2	3
1	1	2	4	2	3	2	2	4
1	1	9	2	1	1	1	1	1
1	1	14	4	2	3	2	2	4
1	1	9	4	2	3	1	1	3
1	1	2	4	2	3	2	2	4
1	1	14	4	2	3	2	2	4
1	1	2	4	2	3	2	2	4
1	1	12	1	2	3	1	1	3
1	1	9	5	2	3	2	2	3
1	1	9	2	1	1	2	2	3
2	1	14	4	2	3	2	2	4
1	1	9	4	1	1	2	2	4
1	4	14	4	2	3	2	2	4
1	1	14	4	2	3	2	2	4
1	1	9	4	2	3	2	2	4
1	1	2	5	2	3	2	2	4
1	1	9	4	2	3	2	2	4
1	1	14	5	2	3	2	2	3
1	1	14	5	2	3	2	2	3
1	1	12	1	2	3	2	2	4
